# Supplementary material
Source: Springer Nature journal article supplement (https://www.springermedizin.de/resource/supplementary/12884_2002_20_MOESM5_ESM.pdf/9459464)
Supplement: MOESM5 [file 9459464]

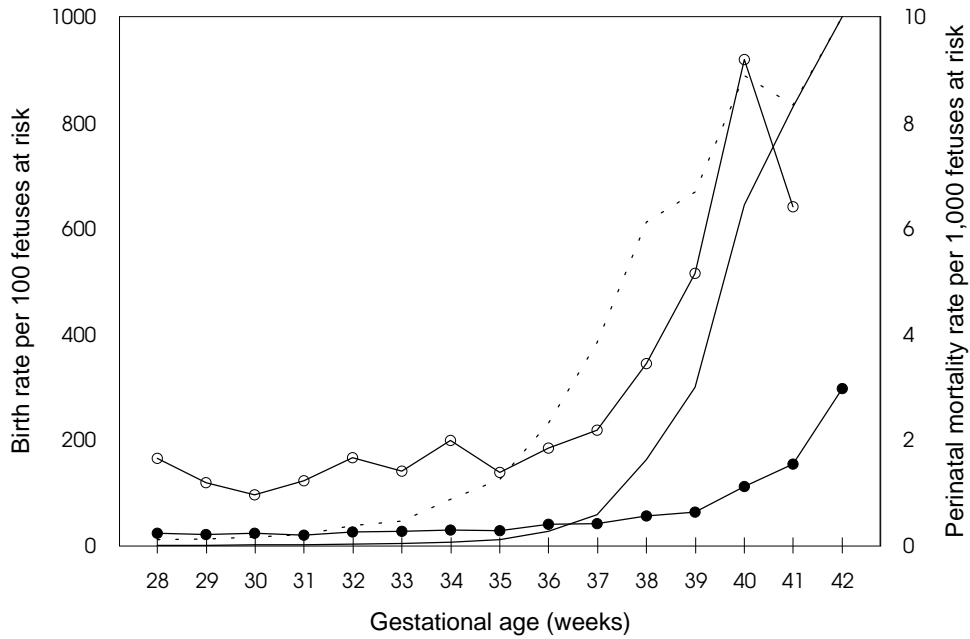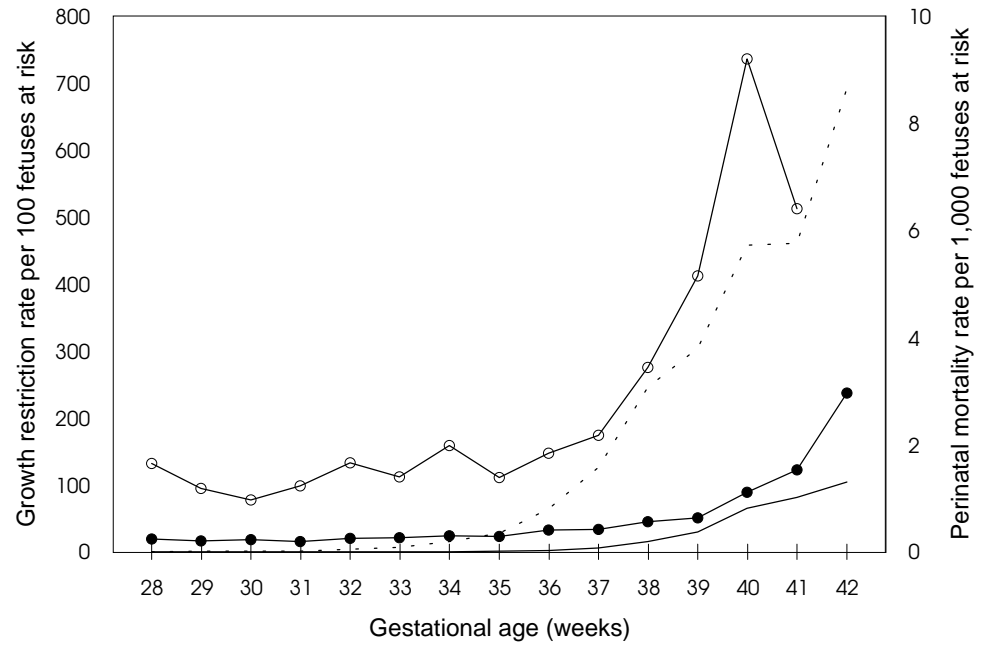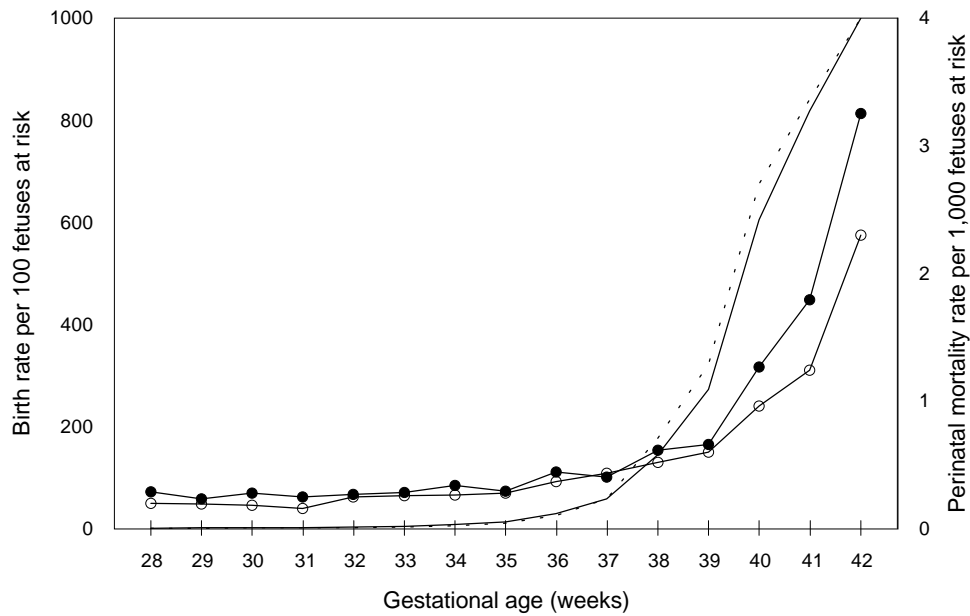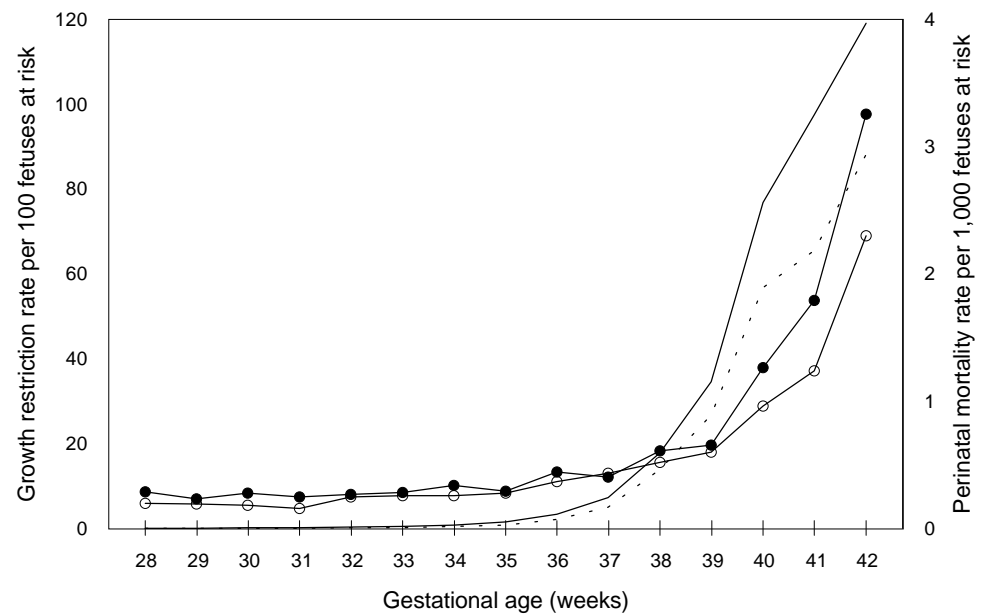

— Birth rate-parity 0    ● Perinatal mortality-parity 0    ○ Perinatal mortality-parity 1+  
 - - - Birth rate-parity 1+

— Growth restriction rate-parity 0    ● Perinatal mortality-parity 0    ○ Perinatal mortality-parity 1+  
 - - - Growth restriction rate-parity 1+
